# Supplementary material for: Neatly arranged mesoporous MnO2 nanotubes with oxygen vacancies for electrochemical energy storage
Source: Royal Society of Chemistry journal article supplement (doi:10.1039/d0dt02733b), 2020-01-01

## Supplementary Information

### Neatly arranged mesoporous MnO<sub>2</sub> nanotubes with oxygen vacancies for electrochemical energy storage

Man Shen<sup>a</sup>, Yi Wang<sup>a</sup>, Yu Xin Zhang<sup>a\*</sup>

<sup>a</sup> *State Key Laboratory of Mechanical Transmissions, College of Materials Science and Engineering, Chongqing University, Chongqing 400044, China*

E-mail: [zhangyuxin@cqu.edu.cn](mailto:zhangyuxin@cqu.edu.cn)

## Calculation equations

### Single Electrode

The specific capacitance ( $C_m$ ) of the electrode was calculated from their charge-discharge curves by the following equations

$$C_m = \frac{I\Delta T}{m\Delta V}$$

where  $m$ ,  $I$ ,  $\Delta T$  and  $\Delta V$  are the weight (g) of the electroactive materials, discharge current (A), the discharging time (s), and the discharging potential range (V), respectively.

### ASC device

The total capacitance ( $C$ ), was calculated from their charge-discharge curves according to the following equation

$$C = \frac{I\Delta T}{M\Delta V}$$

where  $I$ ,  $\Delta T$  and  $\Delta V$  is discharge current (A), the discharging time (s), and the discharging potential range (V), respectively,  $M$  is the sum of the masses of  $\text{MnO}_2$  and AG.

Energy density ( $E$ ) and average power density ( $P$ ) was calculated by the following equations

$$E = \frac{0.5C\Delta V^2}{3.6}$$

$$P = \frac{E}{\Delta t}$$

$\Delta t$  (s) is discharge time,  $I$  (A) is discharge current, and  $\Delta V$  is voltage window.

**Fig. S1** CV curves at different scan rates and CC curves at different current densities. **(a)-(b)**  $\text{MnO}_2$ , **(c)-(d)**  $\text{ov-MnO}_2\text{-200}$ , **(e)-(f)**  $\text{ov-MnO}_2\text{-300}$ , **(g)-(h)**  $\text{ov-MnO}_2\text{-400}$ .

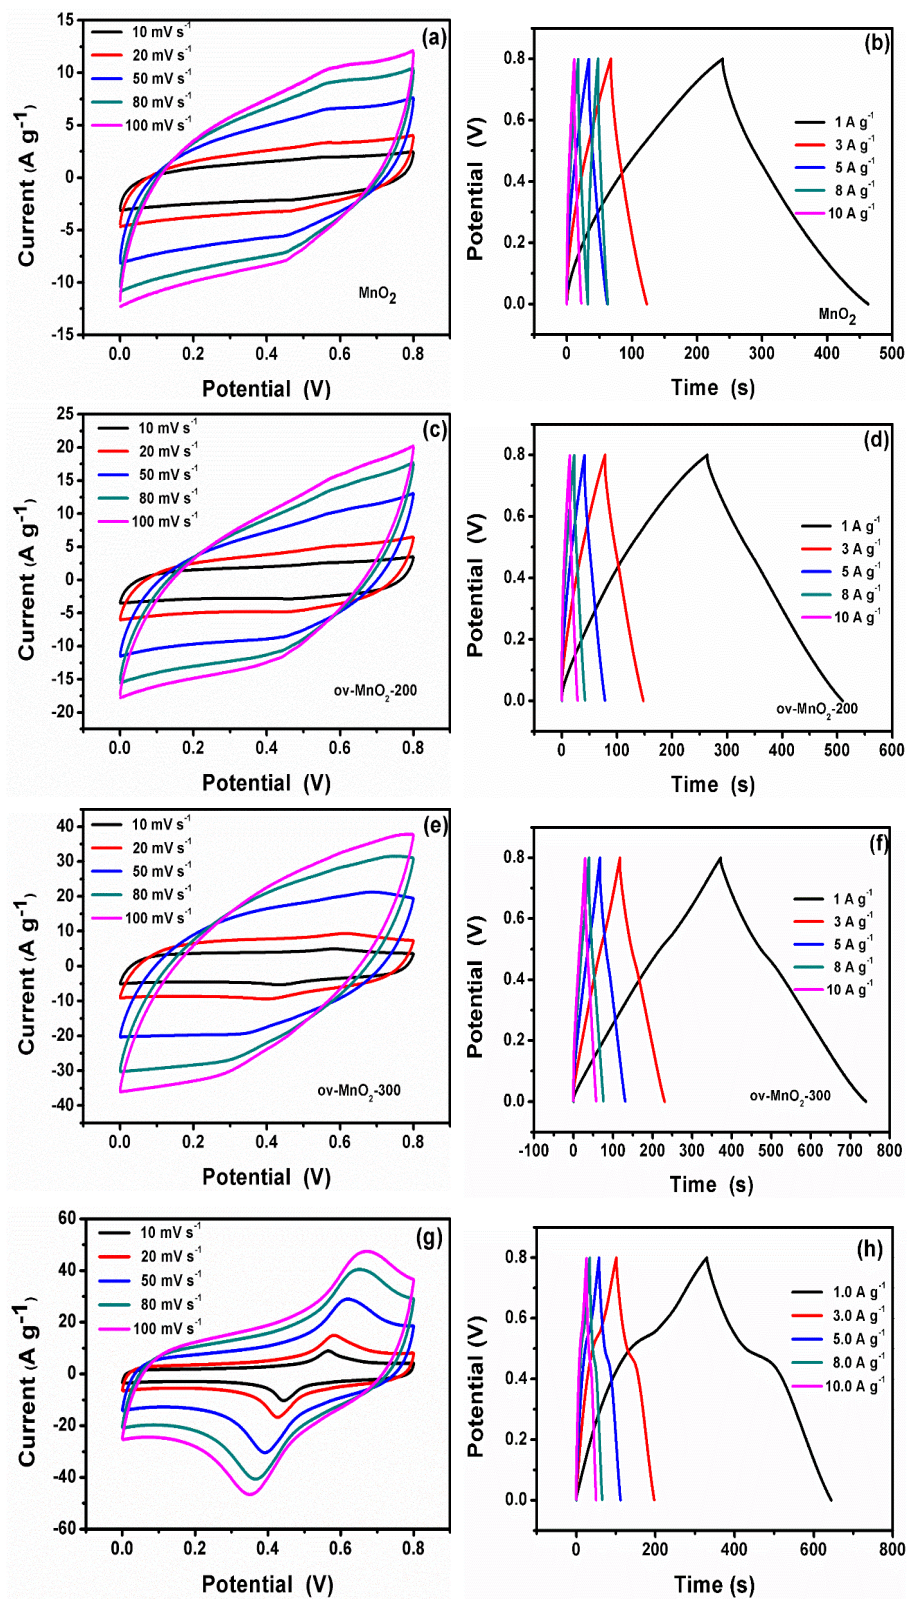

**Fig. S2** The electrochemical performance of the Graphene@MoS<sub>2</sub>. **(a)** CV curves, **(b)** CC curves, **(c)** The cycling performance at the current density of 8 A g<sup>-1</sup>, **(d)** EIS curves before and after 3000 cycles.

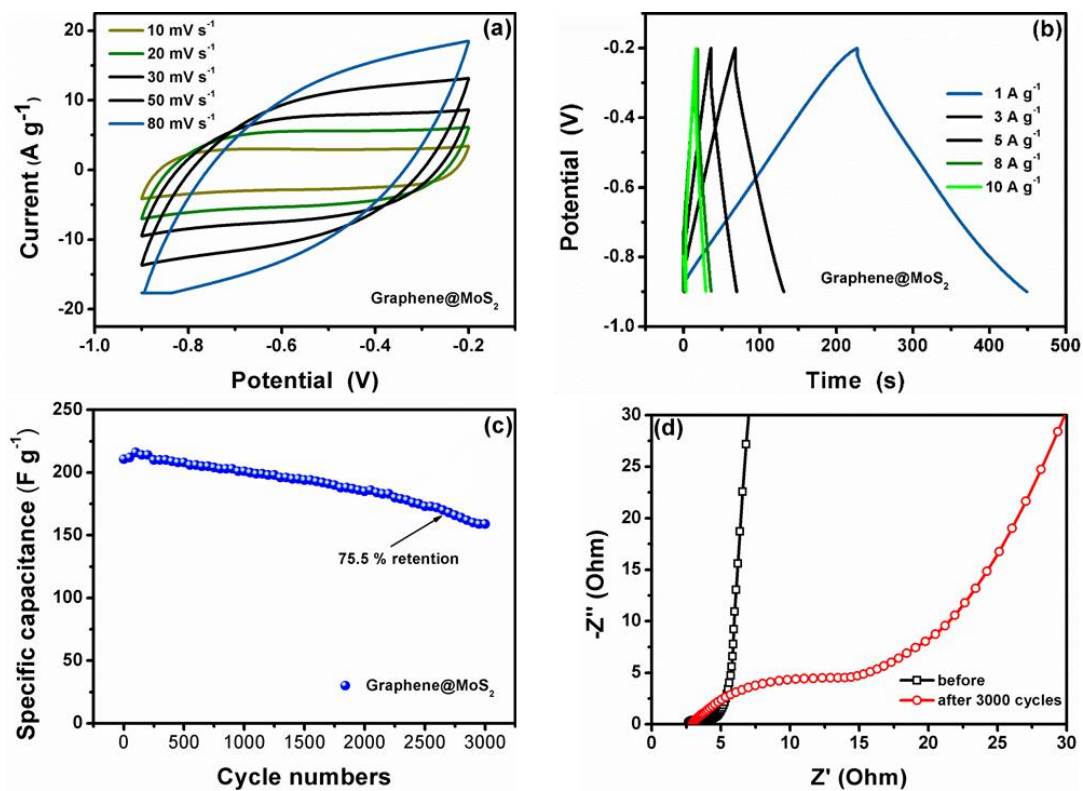

**Fig. S3** (a) Specific capacitance under different current densities. (b) The cycling performance at the current density of  $8 \text{ A g}^{-1}$ . (c) EIS curves before and after 3000 cycles.

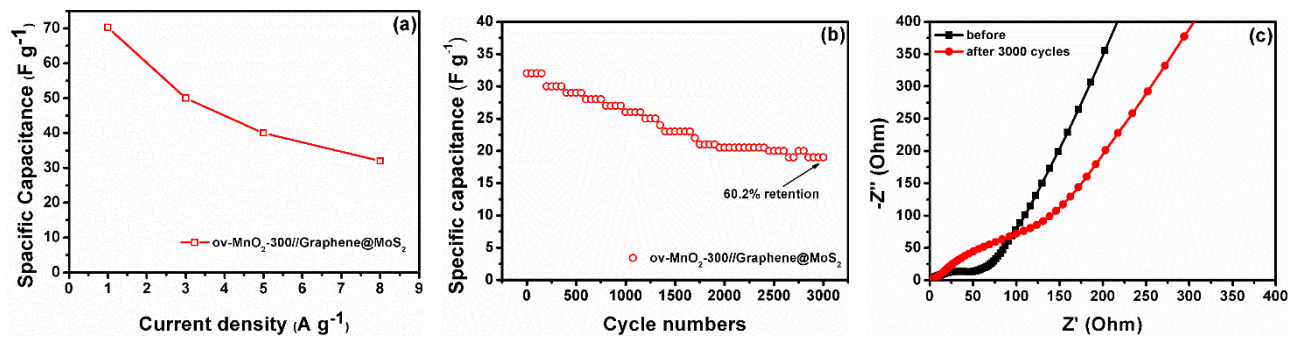

Supplement: d0dt02733b1.pdf [file d0dt02733b1.pdf]
